# Supplementary material for: A microRNA-based signature predicts local-regional failure and overall survival after pancreatic cancer resection
Source: PubMed Central journal article supplement (PMC7075466; doi:10.18632/oncotarget.27496), 2020-03-10
Supplement: oncotarget-11-913-s001.pdf [file oncotarget-11-913-s001.pdf]

# A microRNA-based signature predicts local-regional failure and overall survival after pancreatic cancer resection

## SUPPLEMENTARY MATERIALS

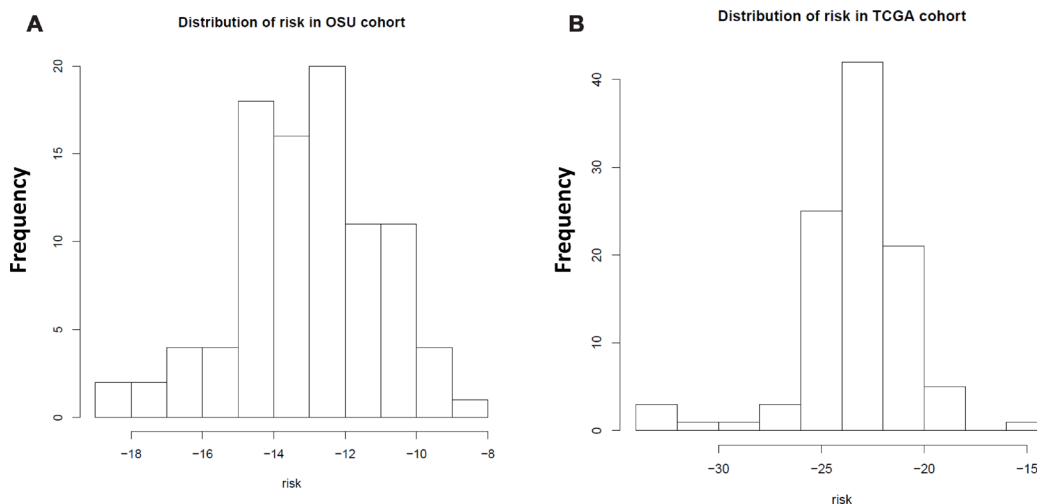

Supplementary Figure 1: Histogram of risk score per patient in the (A) OSU or (B) TCGA cohort.

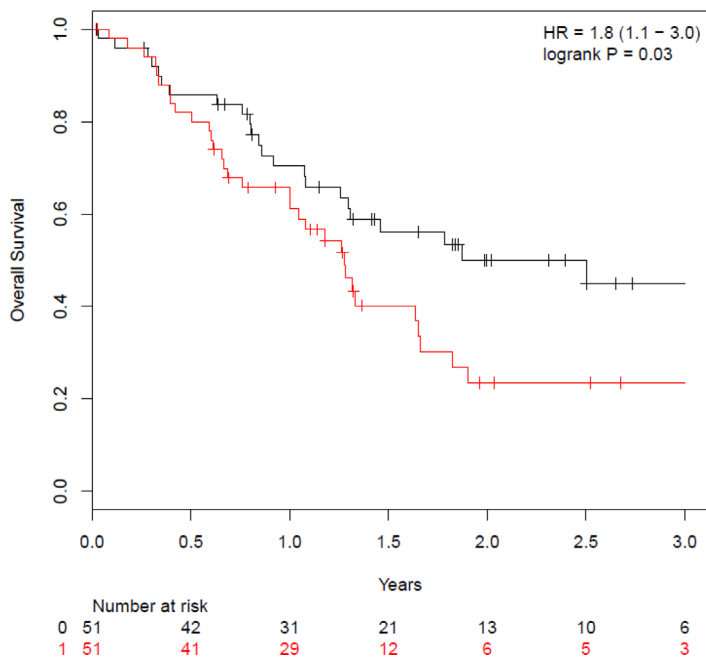

Supplementary Figure 2: Overall survival for high (red) versus low (black) risk groups in the TCGA cohort, only including patients who did not receive post-operative chemoradiation (n = 102 patients).

**Supplementary Table 1: Multivariable analysis of TCGA patients for overall survival who did not receive post-operative chemoradiation (*n* = 102 patients)**

| Variable                              | Hazard ratio for OS | 95% C.I.  | <i>p</i> -value |
|---------------------------------------|---------------------|-----------|-----------------|
| miRNA risk score, continuous          | 1.15                | 1.03–1.30 | <b>0.017</b>    |
| Age, continuous                       | 1.02                | 1.00–1.05 | 0.098           |
| pTstage (T3-4 vs. T1-2 vs T1-2)       | 1.16                | 0.46–2.92 | 0.750           |
| pNstage (1 vs 0)                      | 1.30                | 0.61–2.77 | 0.498           |
| Histologic grade (Grade3 vs Grade1-2) | 1.71                | 0.97–3.01 | 0.064           |
| Margin status (R1 vs R0)              | 2.30                | 1.28–4.13 | <b>0.005</b>    |

**Supplementary Table 2: Potential mechanisms and targets for miRNAs contributing to miRNA risk score**

| microRNA | Proposed target(s)          | Proposed mechanisms                                    |
|----------|-----------------------------|--------------------------------------------------------|
| miR-29c  | Specificity protein 1 (Sp1) | Suppresses EMT Inhibit migration/invasion              |
| miR-125a | PI3K/AKT/mTOR               | Suppresses proliferation/migration                     |
| miR-155  | SOCS1 and STAT3 MLH1        | Inhibit proliferation/invasion                         |
| miR-200b | ERM ZEB1/ZEB2               | Inhibit migration/invasion/proliferation SuppressesEMT |

**Supplementary Table 3: 30 miRNAs commonly linked to human pancreatic cancer based on literature search and used to generate the miRNA risk score which included miR-155, miR-29c, miR-125a, and miR-200b**

| Function                          | miRNA                                                                            |
|-----------------------------------|----------------------------------------------------------------------------------|
| Oncogenic (up-regulated)          | 10a, 15a, 21, 98, 99a, 100, 125b, 155, 221, 222, 223, 301a, 424, 497, 574        |
| Tumor Suppressor (down-regulated) | Let-7b, 26a, 29c, 30a, 30d, 34a, 125a, 126, 141, 200a, 200b, 200c, 217, 375, 494 |

“Oncogenic” miRNAs are typically up-regulated in pancreatic cancer, while “tumor suppressor” miRNAs are typically down-regulated in pancreatic cancer.
